# Supplementary material for: Metallic micro-ring device for highly efficient large cargo delivery in mammalian cells using infrared light pulses
Source: Royal Society of Chemistry journal article supplement (doi:10.1039/d2lc00899h), 2023-01-01
Supplement: d2lc00899h1.pdf [file d2lc00899h1.pdf]

## Supplementary Information

### Metallic Micro-Ring Device for Highly Efficient Large Cargo Delivery in Mammalian Cells using Infrared Light Pulse

Ashwini Shinde<sup>1#</sup>, Pallavi Shinde<sup>1#</sup>, Srabani Kar<sup>2</sup>, Kavitha Illath<sup>1</sup>, Souvik Dey<sup>3</sup>, Nitish R. Mahapatra<sup>3</sup>, Moeto Nagai<sup>4</sup>, Tuhin Subhra Santra<sup>\*1</sup>

<sup>1</sup>Department of Engineering Design, Indian Institute of Technology Madras, Chennai, India.

<sup>2</sup>Department of Electrical Engineering, University of Cambridge, UK.

<sup>3</sup>Department of Biotechnology, Indian Institute of Technology Madras, Chennai, India.

<sup>4</sup>Department of Mechanical Engineering, Toyohashi University of Technology, Japan.

# Authors Contributed Equally; \*Corresponding Author: [tuhin@iitm.ac.in](mailto:tuhin@iitm.ac.in),  
[santra.tuhin@gmail.com](mailto:santra.tuhin@gmail.com)

**Table S1: The comparison of TMR structure shape and dimensions with previously reported microstructures.**

| Shape of microstructure            | Structure material, dimension & interspacing                                                                          | Theoretical study & temperature increment | Cost-effective/fabrication complexity | Large cargo (Cas9/enzyme) | Max. cell viability (%) | Max. delivery efficiency (%) | Ref.         |
|------------------------------------|-----------------------------------------------------------------------------------------------------------------------|-------------------------------------------|---------------------------------------|---------------------------|-------------------------|------------------------------|--------------|
| Microdisc                          | Titanium<br>3 $\mu\text{m}$ diameter<br>15 $\mu\text{m}$ gap                                                          | Yes<br>~1000 K                            | Simple design & fabrication           | No                        | 100                     | 98                           | <sup>1</sup> |
| Nanodisc                           | Gold<br>350 nm, 1, 2, & 10 $\mu\text{m}$                                                                              | Yes<br>~ 650 K                            | Complex fabrication                   | No                        | > 98                    | > 98                         | <sup>2</sup> |
| Pyramid pit micropore              | Chromium/gold<br>50 $\mu\text{m}$ (side length), 2 $\mu\text{m}$ (pyramid top)<br>75 $\mu\text{m}$ spacing            | No                                        | Not so complex                        | CRISPR-Cas9 (> 9kbp)      | -                       | > 90                         | <sup>3</sup> |
| Microwell with nanoscale sharp tip | Titanium<br>8 $\mu\text{m}$ diameter                                                                                  | Yes<br>~1000 K                            | Complex fabrication                   | No                        | > 96                    | > 84                         | <sup>4</sup> |
| Tipless pyramid                    | Gold on the sides and top is polymer<br>300 nm (aperture),<br>2.2 $\mu\text{m}$ base length & 1 $\mu\text{m}$ spacing | Yes                                       | Complex fabrication                   | No                        | -                       | -                            | <sup>5</sup> |
| Microring                          | Titanium<br>10 $\mu\text{m}$ (outer), 3 $\mu\text{m}$ (inner) &                                                       | Yes<br>~1200 K                            | Single-step & cost-effective          | Yes<br>Enzyme (688)       | 97                      | 96                           | Present work |

|  |                          |  |  |      |  |  |  |
|--|--------------------------|--|--|------|--|--|--|
|  | 10 $\mu\text{m}$ spacing |  |  | kDa) |  |  |  |
|--|--------------------------|--|--|------|--|--|--|

1. Shinde, P.; Kar, S.; Loganathan, M.; Chang, H. Y.; Tseng, F.-G.; Nagai, M.; Santra, T. S. Infrared Pulse Laser-Activated Highly Efficient Intracellular Delivery Using Titanium Microdish Device. *ACS Biomater. Sci. Eng.* **2020**, *6* (10), 5645–5652. <https://doi.org/10.1021/acsbiomaterials.0c00785>.
2. Zhao, C.; Man, T.; Xu, X.; Yang, Q.; Liu, W.; Jonas, S. J.; Teitell, M. A.; Chiou, P. Y.; Weiss, P. S. Photothermal Intracellular Delivery Using Gold Nanodisk Arrays. *ACS Mater. Lett.* **2020**, *2* (11), 1475–1483. <https://doi.org/10.1021/acsmaterialslett.0c00428>.
3. Dong, Z.; Jiao, Y.; Xie, B.; Hao, Y.; Wang, P.; Liu, Y.; Shi, J.; Chitrakar, C.; Black, S.; Wang, Y. C.; Lee, L. J.; Li, M.; Fan, Y.; Chang, L. On-Chip Multiplexed Single-Cell Patterning and Controllable Intracellular Delivery. *Microsystems Nanoeng.* **2020**, *6* (1), 1–11. <https://doi.org/10.1038/s41378-019-0112-z>.
4. Man, T.; Zhu, X.; Chow, Y. T.; Dawson, E. R.; Wen, X.; Patananan, A. N.; Liu, T. L.; Zhao, C.; Wu, C.; Hong, J. S.; Chung, P. S.; Clemens, D. L.; Lee, B. Y.; Weiss, P. S.; Teitell, M. A.; Chiou, P. Y. Intracellular Photothermal Delivery for Suspension Cells Using Sharp Nanoscale Tips in Microwells. *ACS Nano* **2019**, *13* (9), 10835–10844. <https://doi.org/10.1021/acsnano.9b06025>.
5. Courvoisier, S.; Saklayen, N.; Huber, M.; Chen, J.; Diebold, E. D.; Bonacina, L.; Wolf, J. P.; Mazur, E. Plasmonic Tipless Pyramid Arrays for Cell Poration. *Nano Lett.* **2015**, *15* (7), 4461–4466. <https://doi.org/10.1021/acs.nanolett.5b01697>.

### COMSOL Simulation Details

The simulation was conducted in a 2D axis symmetry configuration, with the model's symmetry in the Z-direction. The Electromagnetic Waves, Frequency Domain (emw) module was used to calculate resistive heating, which is assumed to be the source of local heating and temperature rise. To get temporal and spatial temperature changes, we created two temperature models (details are supplied in the main paper) that are solved using the COMSOL partial differential equations module. The parameters used in the simulation are mentioned in the table below.

**Table S2:** List of parameters for COMSOL Simulation

|                                              |                                                  |
|----------------------------------------------|--------------------------------------------------|
| Radius of the disc                           | 1500 nm                                          |
| Thickness of disc                            | 150 nm                                           |
| Electron heat capacity coefficient, $\alpha$ | 328.9 J m <sup>-3</sup> K <sup>-2</sup> , Ref[1] |
| Mass density of Titanium, $\rho_{Ti}$        | 4506 kg/m[2]                                     |
| Electron thermal conductivity, $k_e$         | 15.3 W/m.K, Ref[3]                               |
| Lattice thermal conductivity, $k_l$          | 5.2 W/m.K, Ref[3]                                |
| Lattice heat capacity, $C_l$                 | $2.3 \times 10^6$ J/m <sup>3</sup> K, Ref [4]    |
| Electron-lattice coupling coefficient, $g$   | $15 \times 10^{17}$ W/m <sup>3</sup> K, Ref [1]  |

|                                                             |                                                                     |
|-------------------------------------------------------------|---------------------------------------------------------------------|
| Mass density of water, $\rho_w$                             | 1000 kg/m <sup>3</sup>                                              |
| Heat capacity of water, $C_w$                               | 4182 J/kg.K                                                         |
| Thermal conductivity of water, $k_w$                        | 0.6 W/m.K                                                           |
| Thermal conductivity at Ti/water interface, $g_w$           | $105 \times 10^6$ W/m <sup>2</sup> K, calculated following Ref [5]  |
| Mass density of SiO <sub>2</sub> substrate, $\rho_s$        | 2230 kg/m <sup>3</sup> Ref [6]                                      |
| Heat capacity of substrate, $C_s$                           | 830 J/kg.K Ref [6]                                                  |
| Thermal conductivity of substrate, $k_s$                    | 1.2 W/m.K Ref [6]                                                   |
| Thermal conductivity at Ti/substrate interface, $g_s$       | $1725 \times 10^6$ W/m <sup>2</sup> K; calculated following Ref [5] |
| Thermal conductivity at substrate/water interface, $g_{sw}$ | $65.8 \times 10^8$ W/m <sup>2</sup> K; calculated following Ref [5] |

1. Z. Lin, L. V. Zhigilei, V. Celli, Electron-phonon coupling and electron heat capacity of metals under conditions of strong electron-phonon nonequilibrium, *Phys. Rev. B - Condens. Matter Mater. Phys.* 77 (2008) 1–17. <https://doi.org/10.1103/PhysRevB.77.075133>.
2. T. Bell, Titanium Properties and Characteristics, ThoughtCo. (2020). <https://www.thoughtco.com/metal-profile-titanium-2340158>.
3. R.W. Powell, R.P. Tye, The thermal and electrical conductivity of titanium and its alloys, *J. Less-Commn Met.* 3 (1961) 226–233.
4. R.R. Rao, A. Rajput, Lattice specific heat and thermal expansion of titanium, *Phys. Rev. B.* 19 (1979) 3323–3328. <https://doi.org/10.1103/PhysRevB.19.3323>.
5. G. Chang, F. Sun, J. Duan, Z. Che, X. Wang, J. Wang, M.J. Kim, H. Zhang, Effect of Ti interlayer on interfacial thermal conductance between Cu and diamond, *Acta Mater.* 160 (2018) 235–246. <https://doi.org/10.1016/j.actamat.2018.09.004>.
6. BORO FLOAT® 33, Thermal Properties, (n.d.).

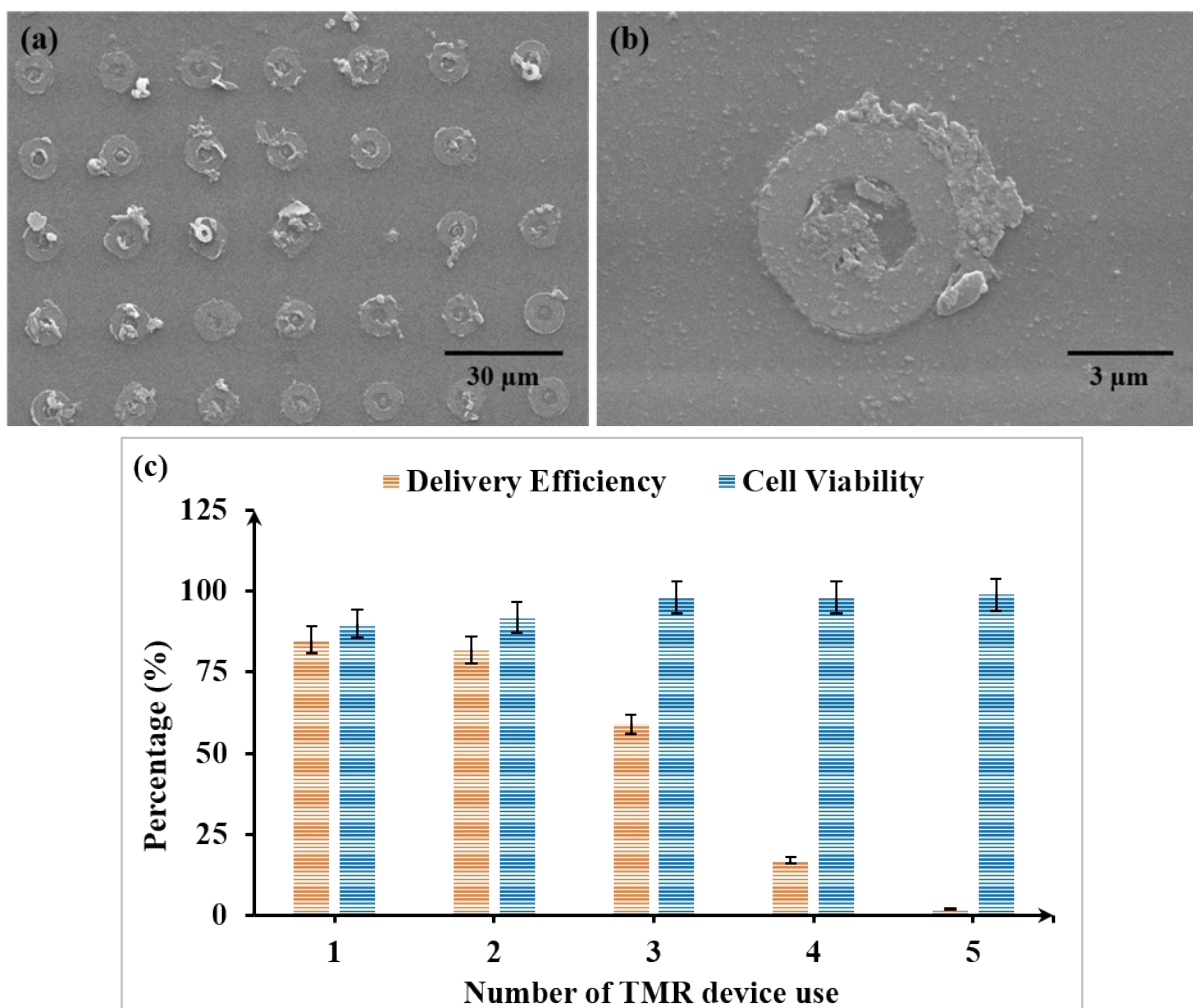

**Figure S1:** (a, b) Scanning electron microscopy (SEM) image of TMR device after three times photoporation experiment with laser fluence of  $45 \text{ mJ/cm}^2$  at  $1050\text{nm}$  for 300 pulses. (c) Quantification of delivery efficiency and cell viability after BG enzyme delivery into L929 cells using same TMR device five times with laser fluence of  $45 \text{ mJ/cm}^2$  at  $1050\text{nm}$  for 250 pulses ( $n=3$  independent experiments, data presented as mean  $\pm$  S.D.).

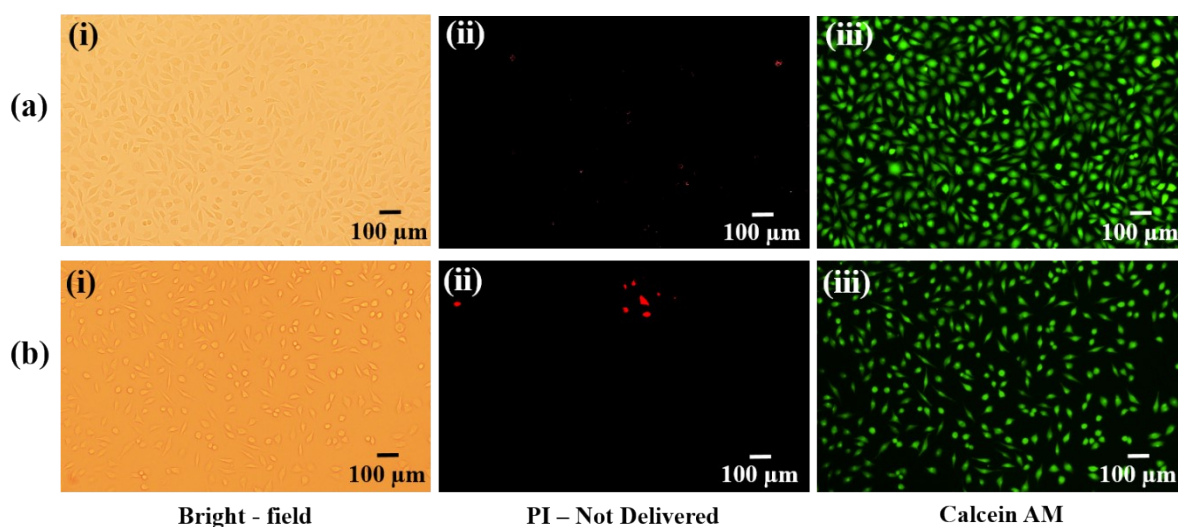

**Figure S2.** Control experiment on L929 cells (Olympus microscope laser exposure for 100 ms) – (a) With TMR platform and no laser exposure- (i) bright-field image; (ii) PI dye staining on the nucleus of dead cells; (iii) cell viability test using calcein-AM confirmed that almost all cells are live (green color). (b) Without TMR platform and with laser exposure at 45 mJ/cm<sup>2</sup> for 250 pulses - (i) bright-field image; (ii) PI dye staining on the nucleus of dead cells; (iii) cell viability test using calcein-AM confirmed that almost all cells are live (green color).

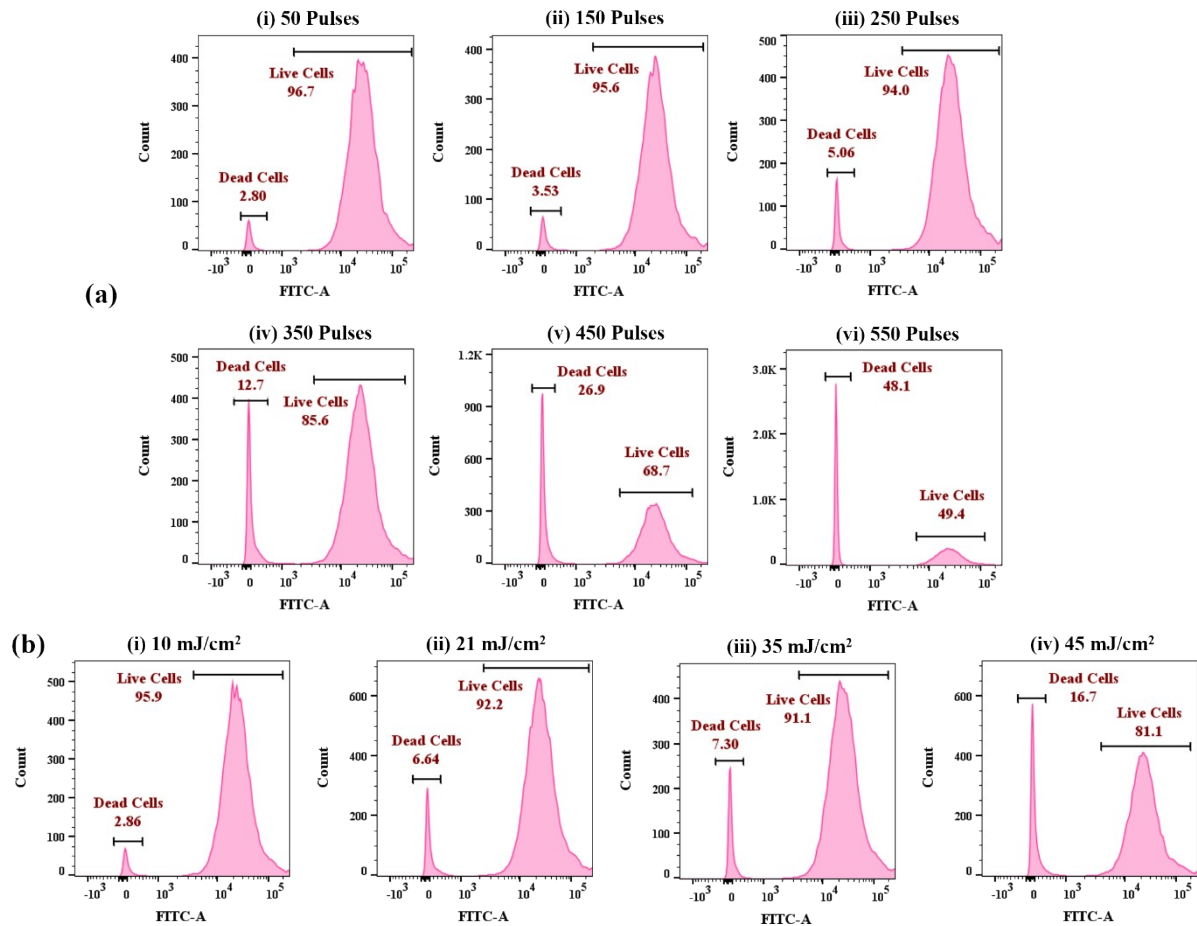

**Figure S3:** Flow cytometry-based assessment for live and dead cells by – (a) Varying number of pulses at fluence 21 mJ/cm<sup>2</sup> – (i) 50 pulses; (ii) 150 pulses; (iii) 250 pulses; (iv) 350 pulses; (v) 450 pulses; (vi) 550 pulses. (b) Varying fluence of the pulse laser for 250 pulses – (i) 10 mJ/cm<sup>2</sup>; (ii) 21 mJ/cm<sup>2</sup>; (iii) 35 mJ/cm<sup>2</sup>; (iv) 45 mJ/cm<sup>2</sup>.

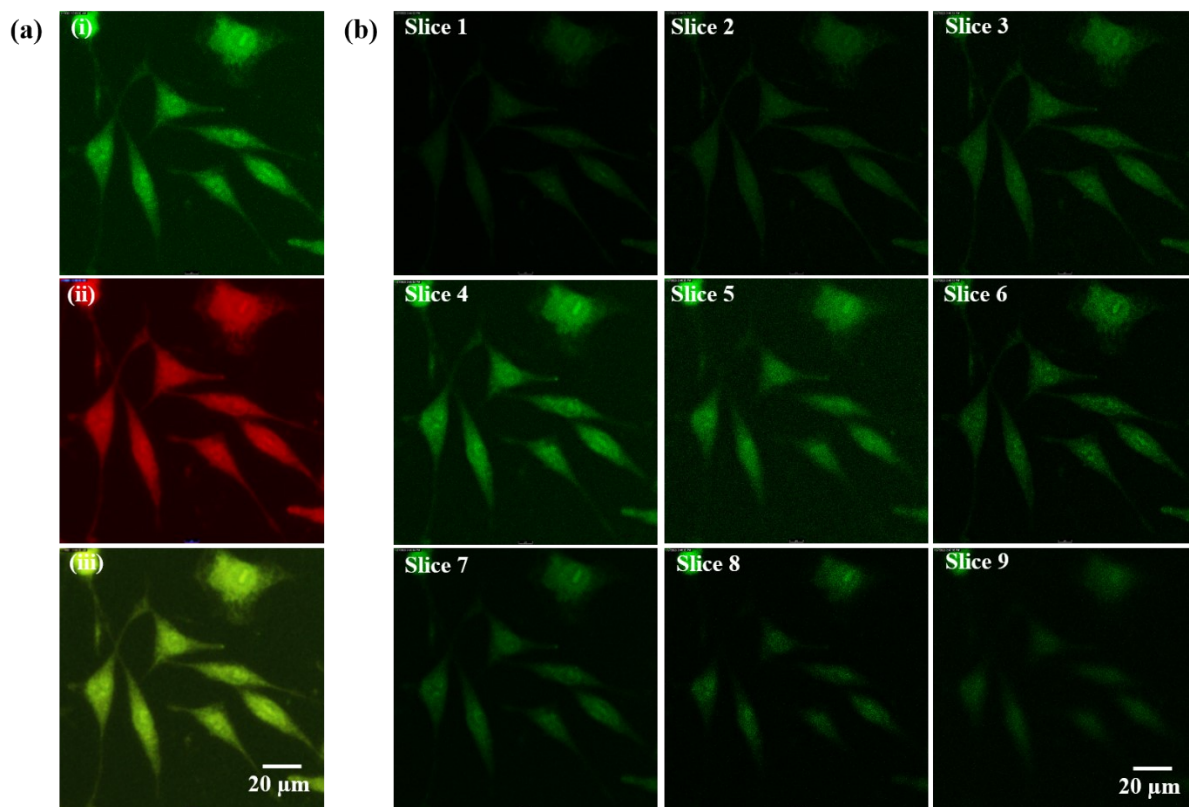

**Figure S4:** Confocal microscope image of L929 cells after siRNA-6FAM delivery using TMR-mediated optoporation (Confocal microscope pin hole used 1.0 with laser intensity at 1.01 mW). (a) Maximum intensity projection images of – (i) siRNA-6FAM (green) delivery; (ii) Calcein red-orange AM (red) showing the viability of cells after siRNA delivery; (iii) merge (green to yellowish green) images of Calcein red-orange AM and siRNA-6FAM confirmed live cells after delivery ( $n=3$ ). (b) Split Z - stack images for the optoporated images of siRNA-6FAM delivery (Slice 1 to Slice 9).

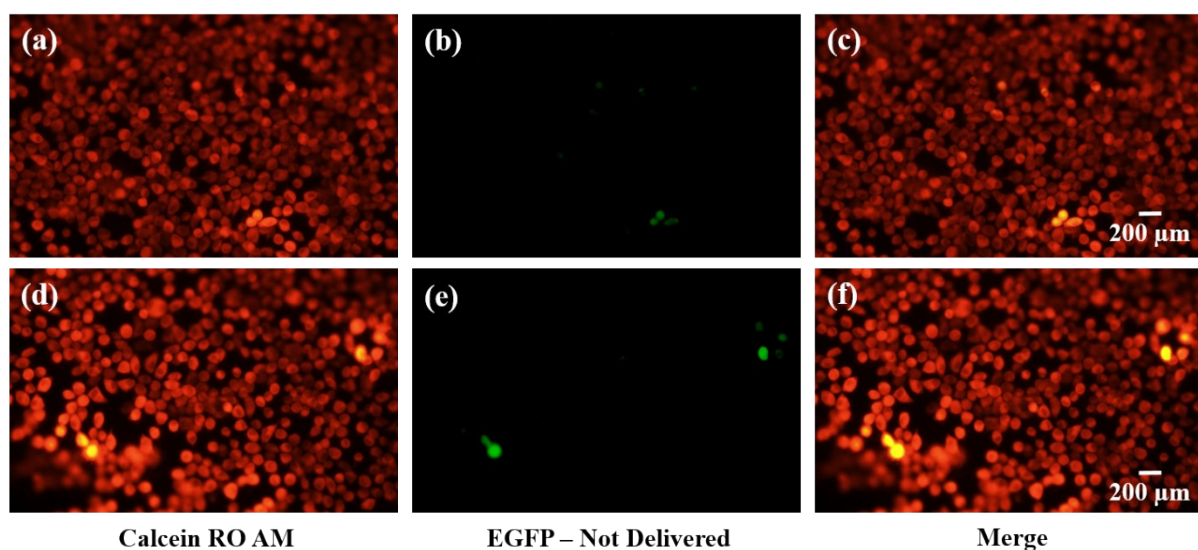

**Figure S5:** Control experiment on N2a cells (Olympus microscope laser exposure for 1 sec) – (a) With TMR platform and no laser exposure- (i) Calcein red-orange AM for live cells; (ii) EGFP showing not delivered;

(iii) merge image showing live cells with no EGFP delivery. (b) Without TMR platform and with laser exposure at  $45 \text{ mJ/cm}^2$  for 250 pulses - (i) Calcein red-orange AM for live cells; (ii) EGFP showing not delivered; (iii) merge image showing live cells with no EGFP delivery.

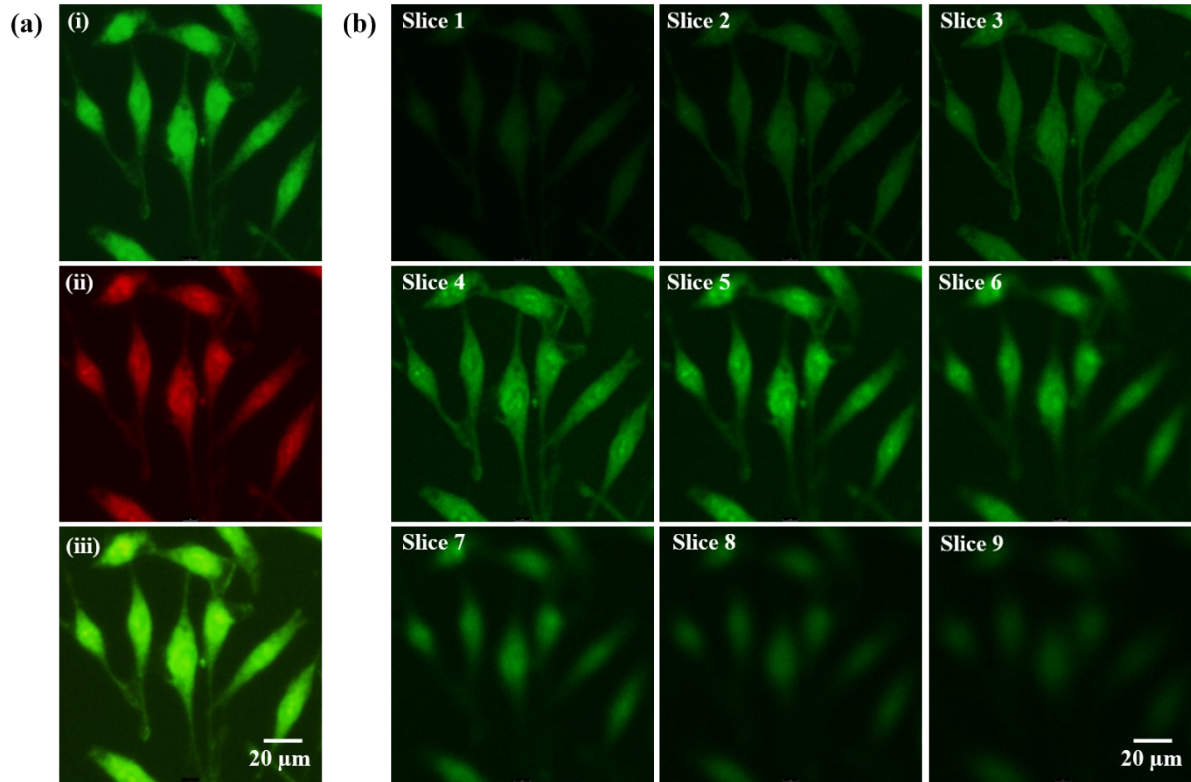

**Figure S6: Confocal microscope image of L929 cells after EGFP delivery using TMR-mediated optoporation (Confocal microscope pin hole used 1.0 with laser intensity at 1.01 mW). (a) Maximum intensity projection images of – (i) EGFP (green) delivery; (ii) Calcein red-orange AM (red) showing the viability of cells after EGFP delivery; (iii) merge (green to yellowish green) images of Calcein red-orange AM and EGFP confirmed live cells after delivery ( $n=3$ ). (b) Split Z - stack images for the optoporated images of EGFP delivery (Slice 1 to Slice 9).**

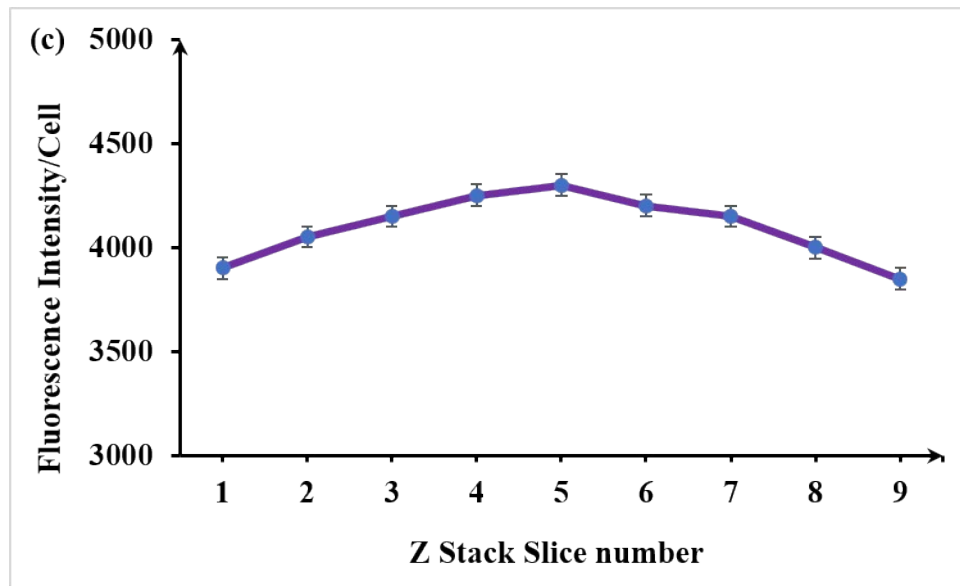

**Figure S7:** Quantification of fluorescence intensity of merged images on a per cell basis indicating uniform delivery and viability of cells ( $n=3$  independent experiments, data presented as mean  $\pm$  S.D).

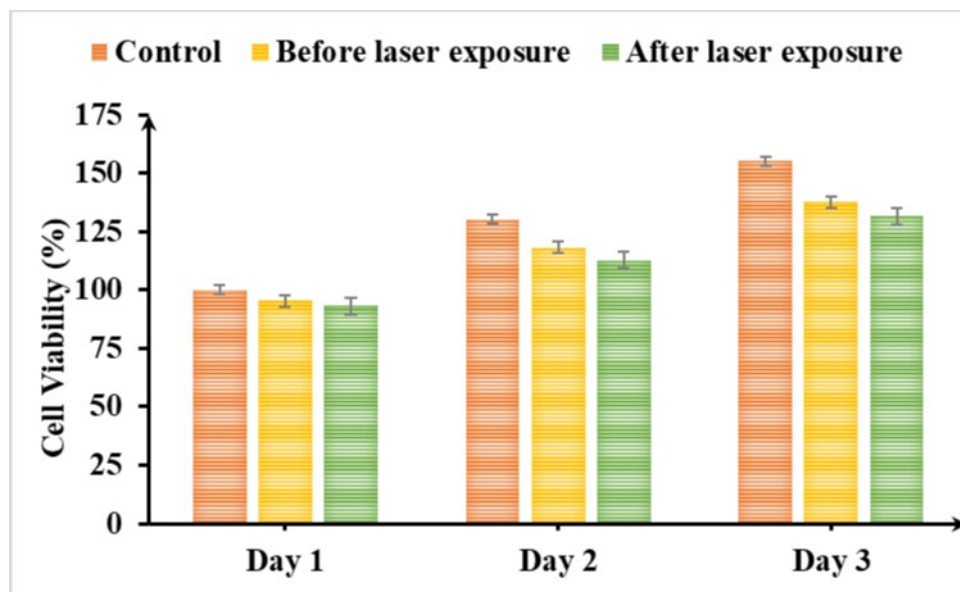

**Figure S8:** Cell viability of SiHa cells using MTT assay on different days after laser exposure with wavelength at 1050 nm, fluence of 21 mJ/cm<sup>2</sup>, and 250 pulses.
